# Supplementary material
Source: publisher site journal article supplement (https://www.dovepress.com/article/315957)
Supplement: Supplementary file 1 [file get_supplementary_file.php]

## Supplementary Materials

### Supplementary Figure legends

**Figure S1** A flowchart describing the research process.

**Figure S2. WGCNA to identify HCC subtype-specific modules.** A-B Determination of the optimal soft threshold. C-E Construction and visualization of co-expression modules. **WGCNA, weighted gene co-Expression network analysis.**

**Figure S3. Correlation between clinical variables and prognostic models.** A Distribution of prognostic risk scores, expression of *MYL6B* and *THOC2* and characteristics of clinical variables. B Prognostic risk of HCC patients with different pathological grades. **\*\*\*\*p < 0.0001(Wilcoxon test).** C HCC patients with vascular tumor invasion had a higher prognostic risk than patients without vascular tumor invasion. **\*p < 0.05(Wilcoxon test).** D There was no significant difference in the prognostic risk of HCC patients with different TNM stages. **NS: not significant.**

**Figure S4. Correlation between clinical variables and the recurrence model.** A Expression of *MYL6B* and *THOC2*, stratification of clinical variables and recurrence risk of HCC patients. B Higher recurrence risk was found in HCC patients with a G3-G4 pathological grade. **\*\*\*\*p < 0.0001(Wilcoxon test).** C Patients with vascular tumor invasion were more likely to experience relapses than patients without vascular tumor invasion. **\*p < 0.05(Wilcoxon test).** D There was no significant difference in recurrence probability among patients with different TNM stages. **NS: not significant.**

**Figure S5. The impact of *MYL6B* and *THOC2* on the expression of immune checkpoints.** A Interaction between *MYL6B* and immune checkpoints including *PDI*, *B7H3*, *CTLA4* and *TIM3*. B-E Correlation between expression of *MYL6B* and the immune checkpoints. **\*\*p < 0.01, \*\*\*p < 0.001 (Wilcoxon test).** F Interaction between *THOC2* and immune checkpoints including *PDI*, *B7H3*, *CTLA4* and *TIM3*. G-J Association between expression of *THOC2* and the immune checkpoints. **\*p < 0.05, \*\*\*p < 0.001 (Wilcoxon test).**

# Supplementary Figures

## Figure S1

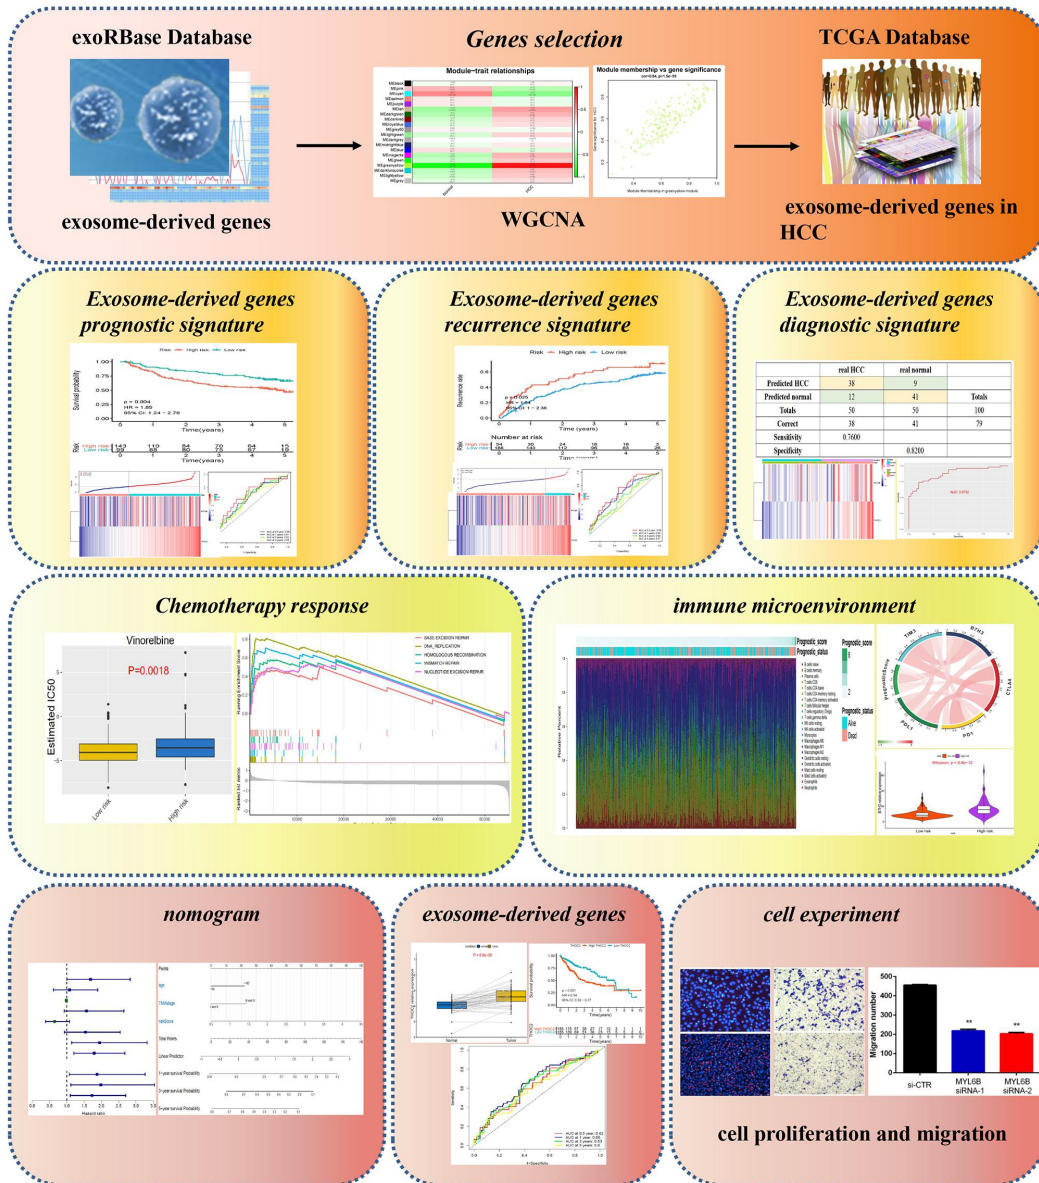

**Figure S2**

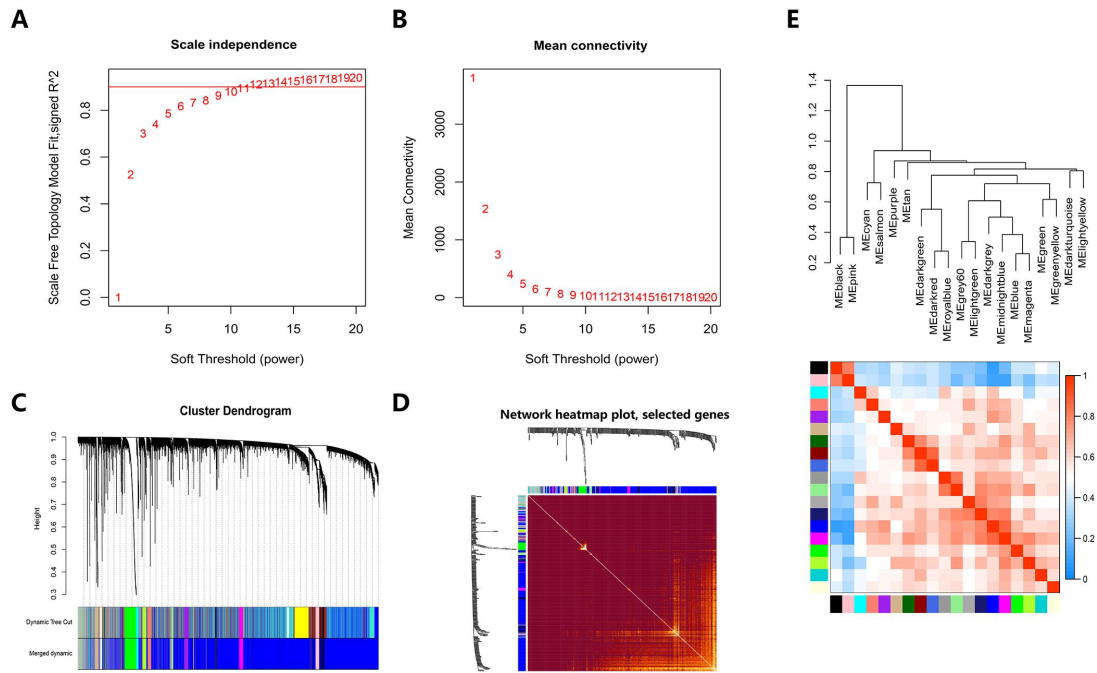

**Figure S3**

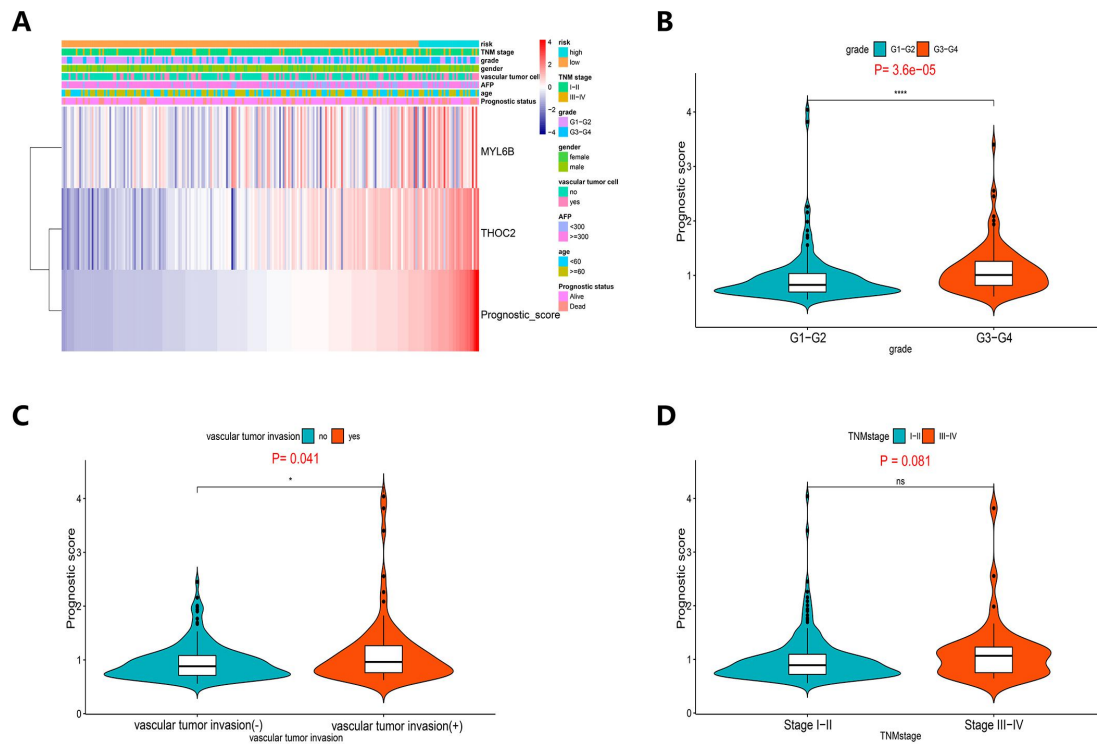

Figure S4

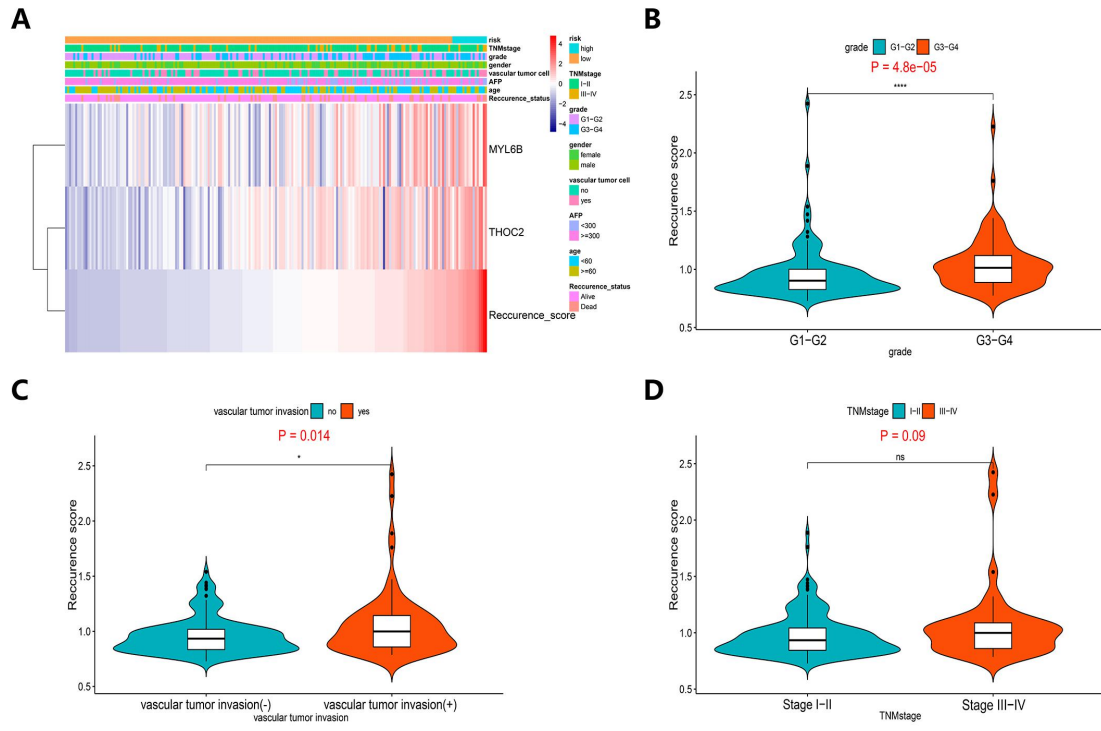

Revised-Figure S5

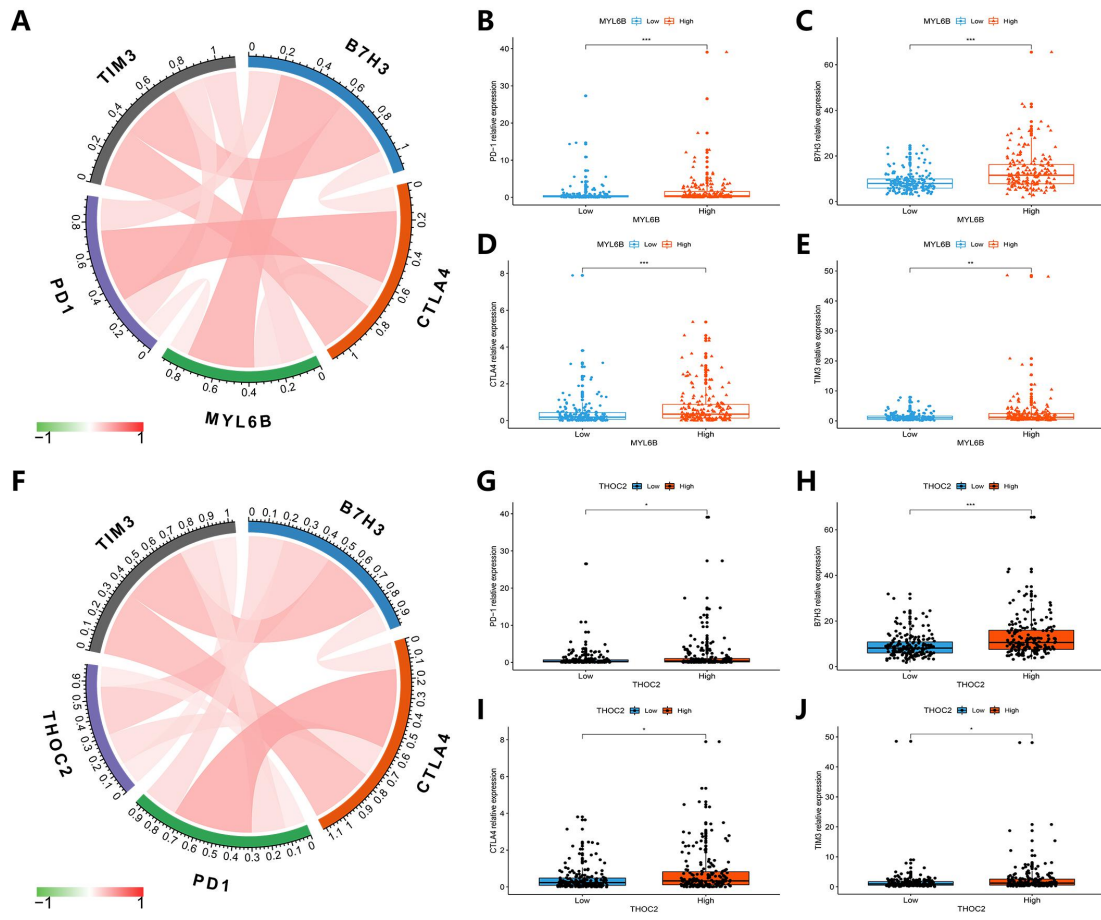

## Supplementary tables

**Table S1**

### **Patients' baseline character in the three cohorts**

| Clinicopathological characterisites | TCGA patients (N=376) |      | GSE14520 (N=242) |      | ICGC (N=260) |      |
|-------------------------------------|-----------------------|------|------------------|------|--------------|------|
|                                     | N                     | %    | N                | %    | N            | %    |
| <b>Age(years)</b>                   |                       |      |                  |      |              |      |
| <60                                 | 172                   | 45.7 | 192              | 79.3 | 50           | 19.2 |
| ≥60                                 | 204                   | 54.3 | 50               | 20.7 | 210          | 80.8 |
| <b>Gender:</b>                      |                       |      |                  |      |              |      |
| Male                                | 254                   | 67.6 | 211              | 87.2 | 192          | 73.8 |
| Female                              | 122                   | 32.4 | 31               | 12.8 | 68           | 26.2 |
| <b>vascular cell invasion</b>       |                       |      |                  |      |              |      |
| Macro                               | 17                    | 4.5  |                  |      |              |      |
| Micro                               | 93                    | 24.7 |                  |      |              |      |
| None                                | 210                   | 55.9 |                  |      |              |      |
| Unknow                              | 56                    | 14.9 |                  |      |              |      |
| <b>AFP</b>                          |                       |      |                  |      |              |      |
| ≤300                                | 218                   | 58.0 | 128              | 52.9 |              |      |
| >300                                | 65                    | 17.3 | 110              | 45.5 |              |      |
| Not available                       | 93                    | 24.7 | 4                | 1.6  |              |      |
| <b>Grade</b>                        |                       |      |                  |      |              |      |
| G1                                  | 55                    | 14.6 |                  |      |              |      |
| G2                                  | 180                   | 47.9 |                  |      |              |      |

|                          |     |      |     |      |     |      |
|--------------------------|-----|------|-----|------|-----|------|
| G3                       | 123 | 32.7 |     |      |     |      |
| G4                       | 13  | 3.5  |     |      |     |      |
| Unknow                   | 5   | 1.3  |     |      |     |      |
| <b>TNM staging</b>       |     |      |     |      |     |      |
| I                        | 175 | 46.5 | 96  | 39.7 | 40  | 15.4 |
| II                       | 86  | 22.9 | 78  | 32.2 | 117 | 45   |
| III                      | 86  | 22.9 | 51  | 21.1 | 80  | 30.8 |
| IV                       | 5   | 1.3  | 0   | 0    | 23  | 8.8  |
| Unknow                   | 24  | 6.4  | 17  | 7.0  |     |      |
| <b>Survival status</b>   |     |      |     |      |     |      |
| Alive                    | 248 | 66.0 | 146 | 60.3 | 214 | 82.3 |
| Death                    | 128 | 34.0 | 96  | 39.7 | 46  | 17.7 |
| <b>Recurrence status</b> |     |      |     |      |     |      |
| Non-recurrence           | 181 | 48.2 | 106 | 43.8 |     |      |
| Recurrence               | 143 | 38.0 | 136 | 56.2 |     |      |
| Not available            | 52  | 13.8 | 0   | 0    |     |      |

**Table S2**

Univariate Cox regression analyses of the prognostic genes in HCC patients.

| id      | HR          | HR. 95L     | HR. 95H     | pvalue      |
|---------|-------------|-------------|-------------|-------------|
| CSF2RA  | 1.085016106 | 0.939750693 | 1.252736454 | 0.265871818 |
| AKAP17A | 1.045876105 | 1.004083617 | 1.089408102 | 0.031096742 |
| HNRNPA3 | 1.028184948 | 1.013451076 | 1.043133026 | 0.00016044  |
| MYL6B   | 1.021231135 | 1.000702409 | 1.042180995 | 0.042587278 |

|            |             |             |             |             |
|------------|-------------|-------------|-------------|-------------|
| SEMA3F     | 1.057437643 | 0.996737462 | 1.121834397 | 0.064080386 |
| PLCXD1     | 0.997441333 | 0.978588464 | 1.016657409 | 0.792440782 |
| SLC25A6    | 1.001175675 | 0.999485118 | 1.002869092 | 0.172983617 |
| HIST1H4K   | 0.957755181 | 0.774365767 | 1.18457585  | 0.69061616  |
| THOC2      | 1.199677191 | 1.104575089 | 1.302967428 | 1.56E-05    |
| F0538757.1 | 1.376714631 | 1.097542242 | 1.726897701 | 0.005693986 |
| P2RY8      | 0.877249838 | 0.77132224  | 0.997724738 | 0.046080284 |
| RPL36A     | 1.000627727 | 0.988636297 | 1.012764604 | 0.918743859 |
| HBA2       | 0.997399767 | 0.991430056 | 1.003405424 | 0.395303745 |
| PPP2R3B    | 1.20065909  | 0.920226131 | 1.566552179 | 0.17784813  |
| HSPA1B     | 1.001139772 | 0.996963503 | 1.005333535 | 0.593276784 |
| TUBB2A     | 1.004638096 | 0.997555223 | 1.011771258 | 0.199884755 |
| RPL39      | 1.001659095 | 0.996903261 | 1.006437616 | 0.494806757 |
| SLC38A2    | 0.99668396  | 0.988240551 | 1.005199507 | 0.444144498 |
| VOPP1      | 1.050101558 | 1.008795642 | 1.093098776 | 0.016955494 |

---

**Multivariate Cox regression analyses of the prognostic genes in HCC patients**

---

| <b>id</b> | <b>HR</b>   | <b>HR. 95L</b> | <b>HR. 95H</b> | <b>pvalue</b> |
|-----------|-------------|----------------|----------------|---------------|
| MYL6B     | 1.027678372 | 1.00614828     | 1.049669175    | 0.011492123   |
| THOC2     | 1.213018758 | 1.116886377    | 1.317425423    | 4.56E-06      |

---
